# Supplementary material for: A Multifactorial Approach to Untangle Graphene Oxide (GO) Nanosheets Effects on Plants: Plant Growth-Promoting Bacteria Inoculation, Bacterial Survival, and Drought
Source: PubMed Central journal article supplement (PMC8002891; doi:10.3390/nano11030771), 2021-03-18
Supplement: nanomaterials-11-00771-s001.pdf [file nanomaterials-11-00771-s001.pdf]

# A Multifactorial Approach to Untangle Graphene Oxide (GO) Nanosheets Effects on Plants: Plant Growth-Promoting Bacteria Inoculation, Bacterial Survival, and Drought

Tiago Lopes <sup>1</sup>, Catarina Cruz <sup>1</sup>, Paulo Cardoso <sup>2</sup>, Ricardo Pinto <sup>2</sup>, Paula A.A.P. Marques<sup>3</sup> and Etelvina Figueira <sup>2,\*</sup>

<sup>1</sup> Department of Biology, University of Aveiro, Aveiro, Portugal; tslopes@ua.pt (T.L.); catarinasilvacruz@ua.pt (C.C.)

<sup>2</sup> Department of Biology & CESAM- Centre for Environmental and Marine Studies, University of Aveiro, Aveiro, Portugal; pjcardoso@ua.pt (P.C.); rl.pinto@ua.pt (R.P.)

<sup>3</sup> Department of Mechanics & TEMA- Centre for Mechanical Technology and Automation, University of Aveiro, Aveiro, Portugal; paulam@ua.pt

\* Correspondence: efigueira@ua.pt

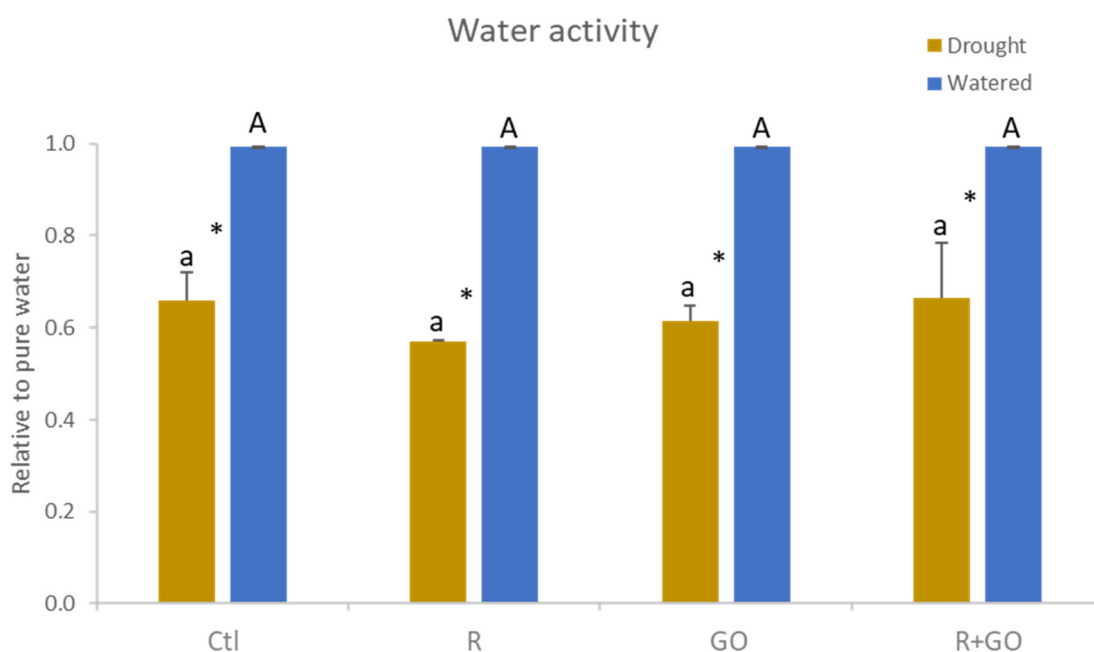

**Figure S1.** Water activity in the sand. Ctl- no addition of graphene oxide nanosheets, no bacterial inoculation; R- no addition of graphene oxide nanosheets, inoculation with *Rhizobium* strain E20-8; GO- addition of graphene oxide nanosheets, no bacterial inoculation; R+GO- addition of graphene oxide nanosheets, inoculation with *Rhizobium* strain E20-8.
